# Supplementary material for: Factors Contributing to Tumor Shrinkage after Peptide Receptor Radionuclide Therapy in Patients with Unresectable Neuroendocrine Tumors
Source: MDPI journal article supplement (doi:10.3390/cancers14143317), 2022-07-07
Supplement: s1 [file s1]

**Table S1.** Factors associated with tumor shrinkage in NET in patient-based analysis.

|                            |                                               | Number of patients, n (%) | Shrinkage rate (median [95%CI]) | P value |
|----------------------------|-----------------------------------------------|---------------------------|---------------------------------|---------|
| SRS score                  | score 2                                       | 1 (5)                     | 31.3 [-]                        | 0.5439  |
|                            | score 3                                       | 1 (5)                     | 37,5 [-]                        | 0.7948  |
|                            | score 4                                       | 18 (90)                   | 30.9 [0.29~27.3]                | 0.5287  |
| Primary lesion             | Pancreas                                      | 10 (20)                   | 28.6 [9.82~47.4]                | 0.8494  |
|                            | Rectum                                        | 5 (25)                    | 13.7 [-30.3~57.7]               | 0.2056  |
|                            | GI                                            | 2 (10)                    | 41.0 [-162.3~244,3]             | 0.7055  |
|                            | Others                                        | 3 (15)                    | 36.5 [30.8~42.3]                | 0.7913  |
| Ki67 labeling index        | <10%                                          | 14 (70)                   | 33.5 [22.1~44.9]                | 0.7415  |
|                            | >10%                                          | 6 (30)                    | 27.3 [-11.3~65.7]               |         |
| Therapeutic drug           | <sup>90</sup> Y and <sup>177</sup> Lu-DOTATOC | 11 (55)                   | 32.9 [14.0~51.9]                | 0.4704  |
|                            | <sup>177</sup> Lu-DOTATOC                     | 9 (45)                    | 30.0 [12.8~47.1]                |         |
|                            |                                               |                           |                                 |         |
| Previous treatment         |                                               |                           |                                 |         |
| Cytotoxic agent            | yes                                           | 5 (25)                    | 48.6 [29.8~67.4]                | 0.0887  |
|                            | no                                            | 15 (75)                   | 25.9 [11.8~40.1]                |         |
| Targeted molecular therapy | yes                                           | 16 (80)                   | 27.5 [13.6~41.8]                | 0.0726  |
|                            | no                                            | 4 (20)                    | 47.8 [28.7~66.9]                |         |
| Somatostatin analog        | yes                                           | 11 (55)                   | 31.3 [17.3~45.3]                | 0.6214  |
|                            | no                                            | 9 (45)                    | 31.9 [8.2~55.6]                 |         |
| SSA maintenance treatment  | yes                                           | 7 (35)                    | 22.1 [-6.4~50.6]                | 0.4516  |
|                            | no                                            | 13 (65)                   | 36.7 [24.0~49.4]                |         |
| Tumor size before PRRT     | <3.0cm                                        | 9 (45)                    | 33.5 [17.1~49.8]                | 0.8494  |
|                            | >3.0cm                                        | 11 (55)                   | 30.1 [10.7~49.4]                |         |

Abbreviations: NET, neuroendocrine tumor; SRS, somatostatin receptor scintigraphy; CI, confidence interval; GI, gastrointestinal tract; SSA, somatostatin analog; PRRT, peptide receptor radionuclide therapy
